# Supplementary material
Source: MDPI journal article supplement (https://www.mdpi.com/2073-4441/15/20/3528)
Supplement: s1 [file s1 › water-2638961-supplementary.pdf]

# **A Framework to Quantify Riverine Dissolved Inorganic Nitrogen Exports under Changing Land-Use Patterns and Hydrologic Regimes**

**Zhenyu Zhang <sup>†</sup>, Yajing Liao <sup>†</sup> and Jinliang Huang <sup>\*</sup>**

Fujian Key Laboratory of Coastal Pollution Prevention and Control, Xiamen University, Xiamen 361102, China

<sup>\*</sup> Correspondence: jlh Huang@xmu.edu.cn

<sup>†</sup> These authors contributed equally to this work and should be considered co-first authors.

Number of pages: 5

Number of figures: 4

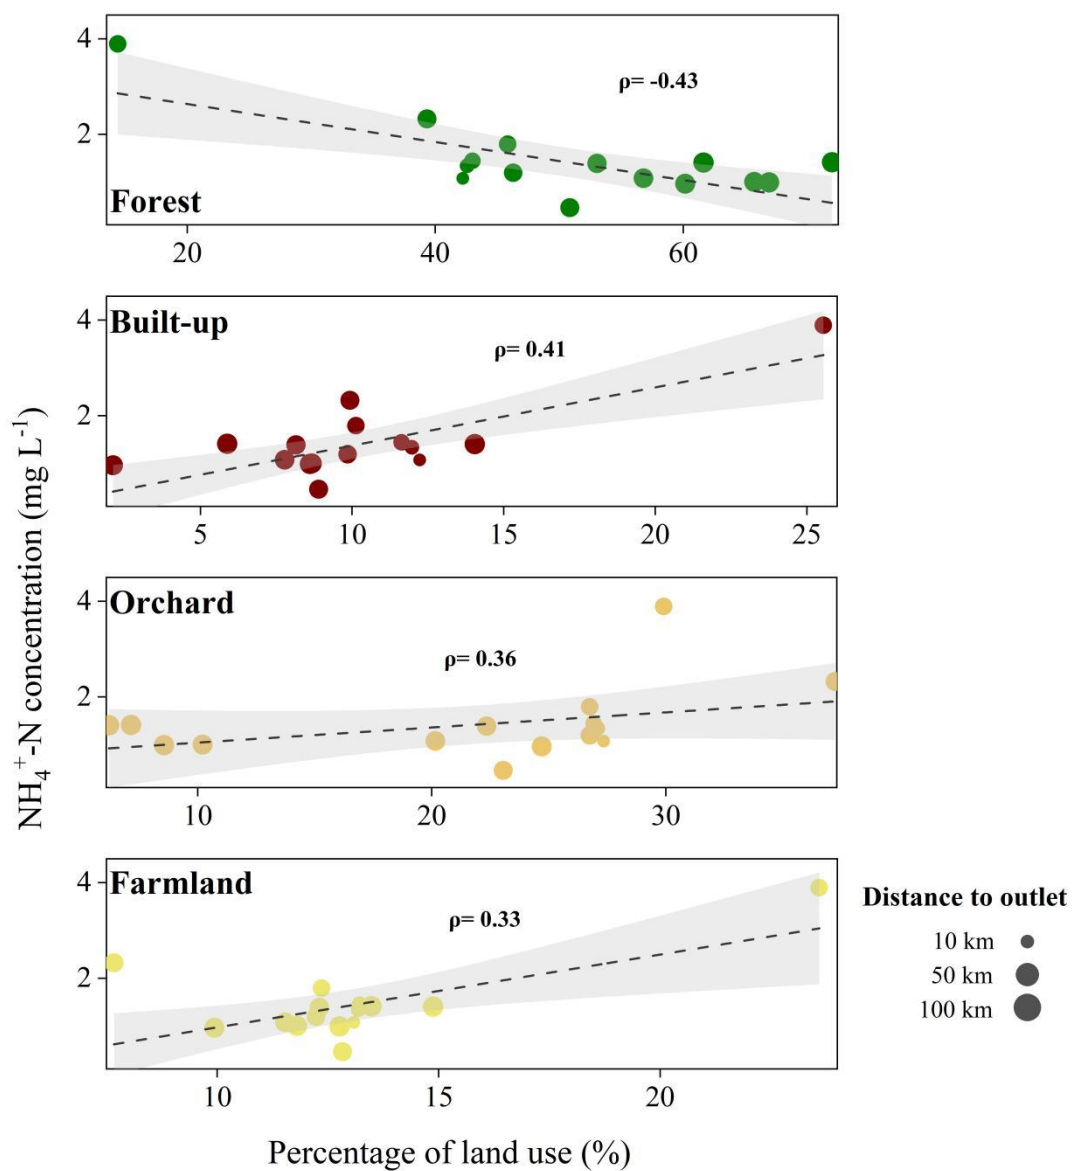

Figure S1. Impact of Land Use (%) on  $\text{NH}_4^+\text{-N concentration (mg L}^{-1}\text{)}$

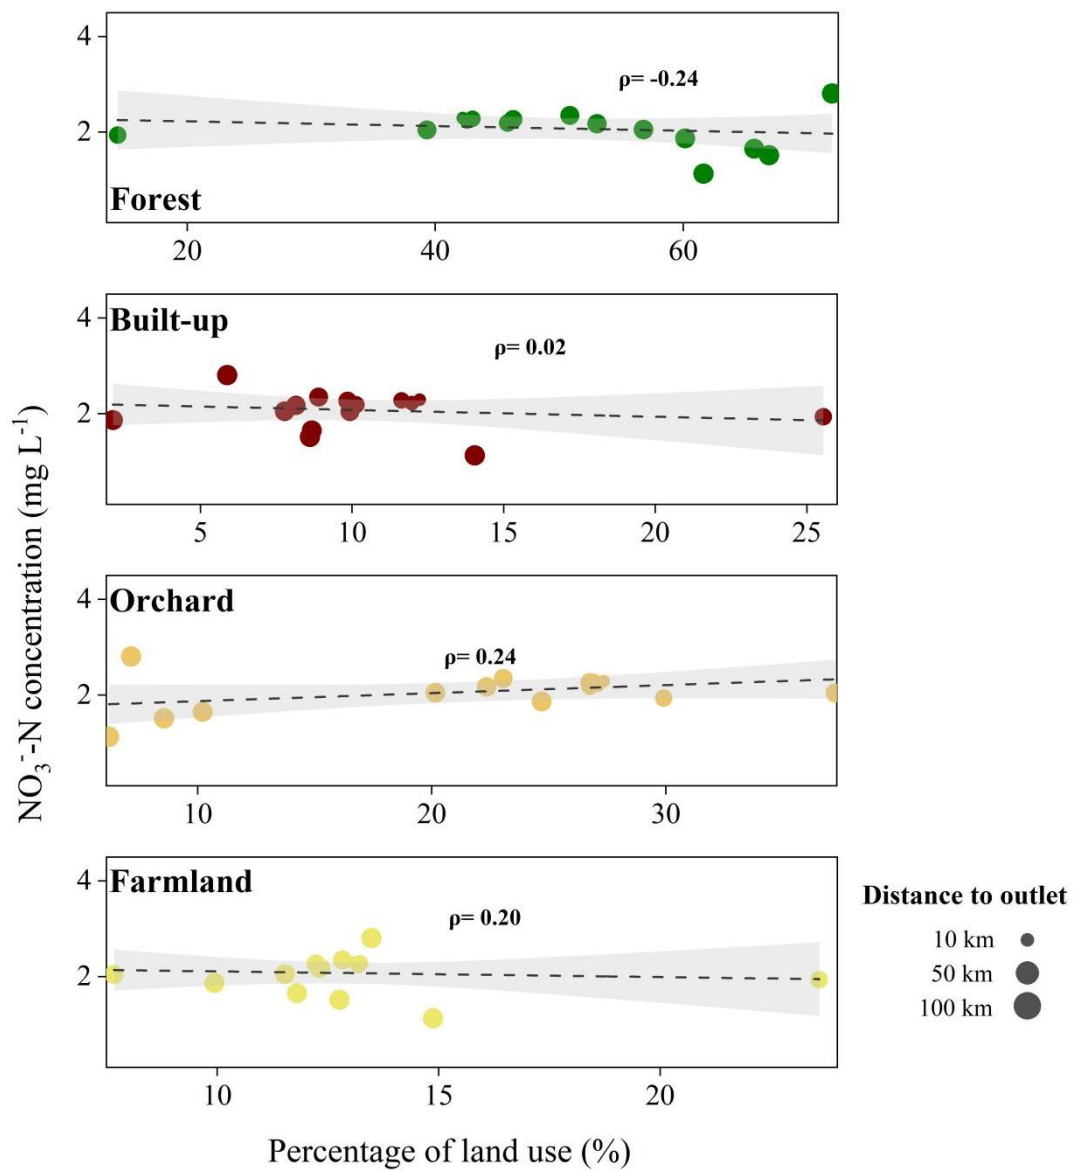

Figure S2. Impact of Land Use (%) on  $\text{NO}_3^- \text{-N concentration (mg L}^{-1}\text{)}$

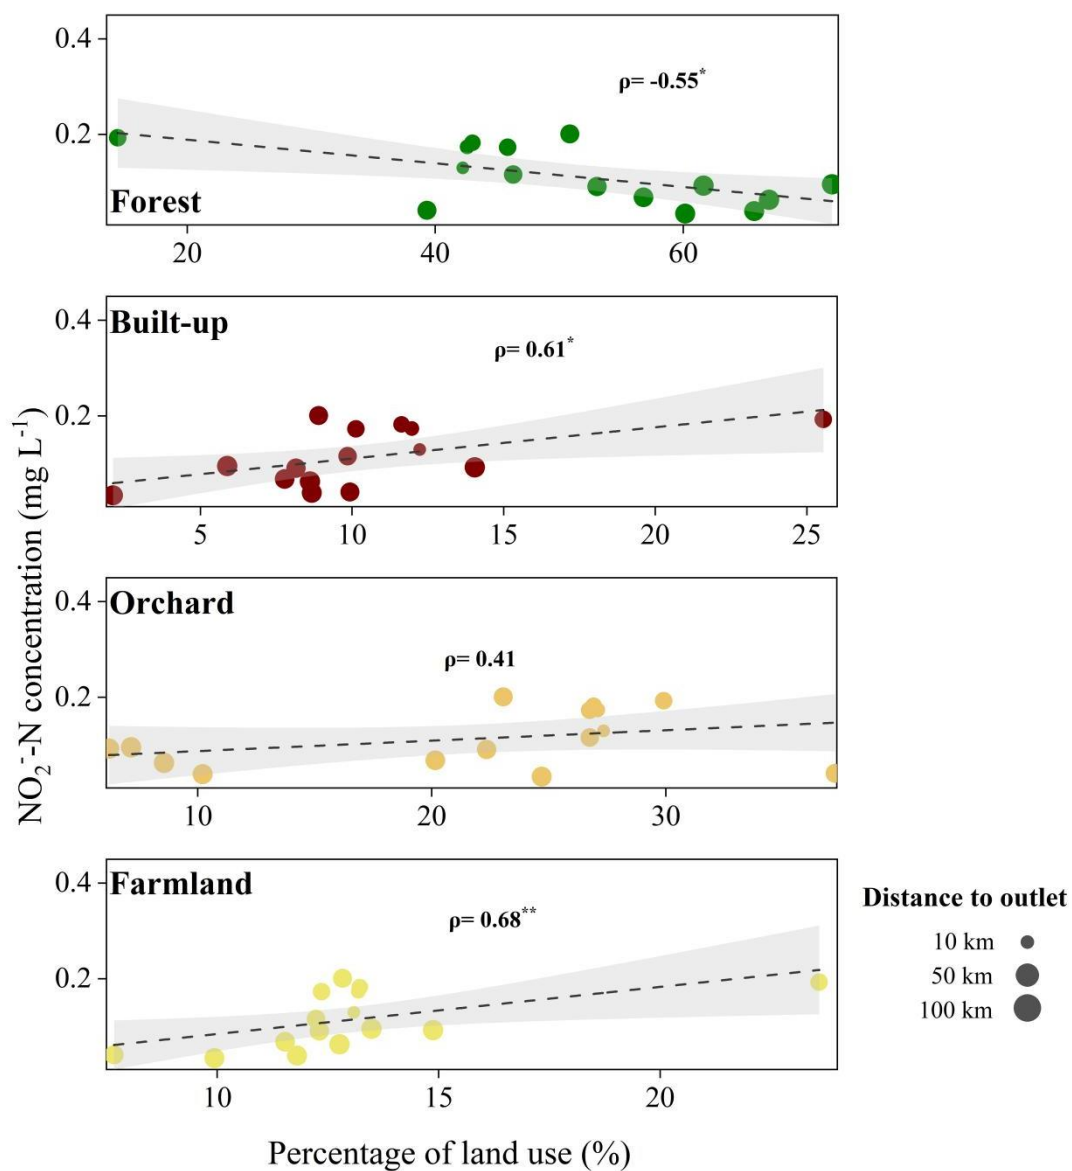

Figure S3. Impact of Land Use (%) on  $\text{NO}_2\text{-N}$  concentration ( $\text{mg L}^{-1}$ )

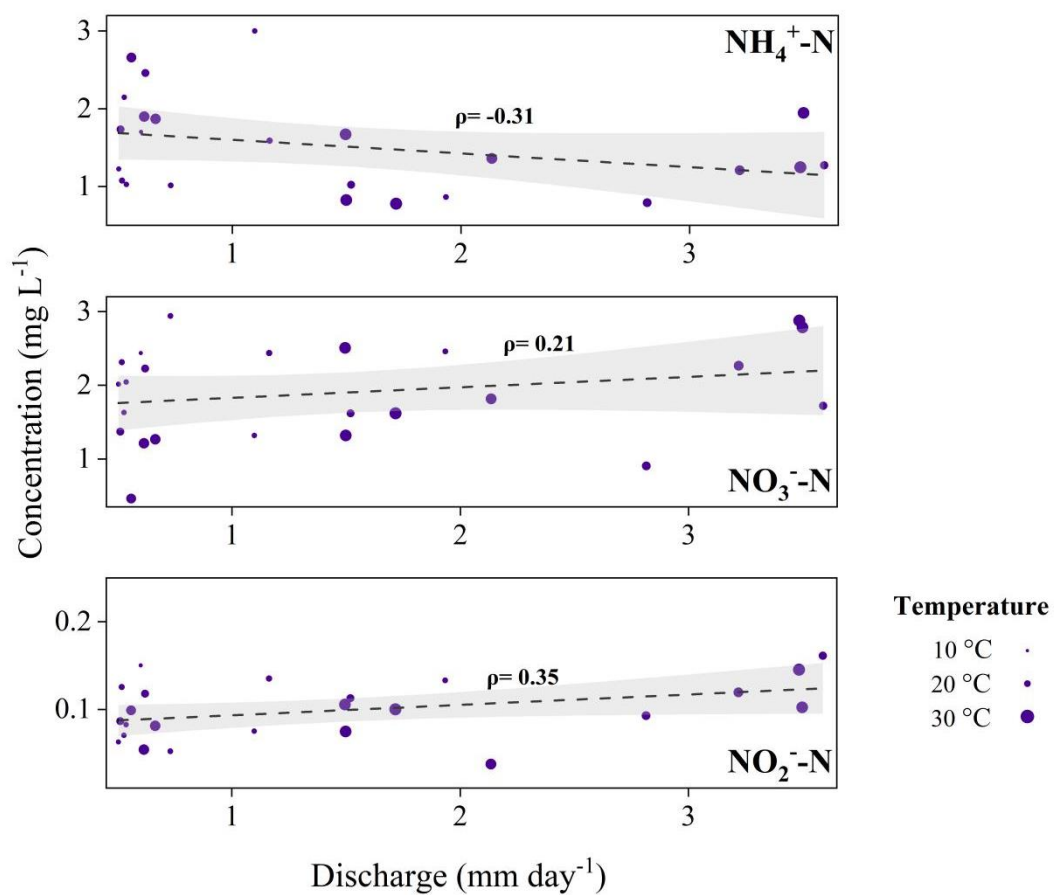

Figure S4. Impact of Discharge (mm day<sup>-1</sup>) on NH<sub>4</sub><sup>+</sup>-N, NO<sub>3</sub><sup>-</sup>-N and NO<sub>2</sub><sup>-</sup>-N concentration (mg L<sup>-1</sup>)
